# Supplementary material for: The Prevalence and Natural History of Hepatic Cysts Examined by Ultrasound: A Health Checkup Population Retrospective Cohort Study
Source: Research Square preprint supplement (doi:10.21203/rs.3.rs-1404525/v1), 2022-03-07
Supplement: Supplementary file 1 [file 2f1bc245c38bc55564d1eb15.xlsx]

## Sheet: Table 1
			Table 1. Demographics and ultrasonographic findings according to hepatic cyst size
				None	≦10 mm	11–30 mm	31–50 mm	50 mm＜
			Variables	n = 30355	n = 4433	n = 3379	n = 467	n = 208
			Age (years), mean±SD	52.22 ± 11.66	56.09 ± 10.72	58.25 ± 9.79	60.73 ± 8.96	61.53 ± 9.08
			Female , n (%)	13070 (43.1)	1786 (40.3)	1594 (47.2)	262 (56.1)	119 (57.2)
			Multiple hepatic cysts, n (%) *	-	1273 (28.8)	2046 (60.6)	367 (78.8)	183 (88.0)
			Kidney cyst, n (%)	4944 (16.3)	1060 (23.9)	850 (25.2)	137 (29.3)	71 (34.1)
			Pancreatic cyst, n (%)	231 (0.8)	60 (1.4)	53 (1.6)	11 (2.4)	1 (0.5)
			Splenic cyst, n (%)	42 (0.1)	6 (0.1)	5 (0.1)	1 (0.2)	0
			SD; standard deviation.
			*Number information was missing in 12 cases (8: ≦10 mm, 3: 11–30 mm, and 1: 31–50 mm).
